# Supplementary material for: Glyco-decorated tobacco mosaic virus as a vector for cisplatin delivery
Source: Royal Society of Chemistry journal article supplement (doi:10.1039/c7tb00100b), 2017-01-01
Supplement: c7tb00100b1.pdf [file c7tb00100b1.pdf]

*Supplementary Information*

**Glyco-decorated tobacco mosaic virus as a vector for cisplatin  
delivery**

Xiangxiang Liu,<sup>a,b</sup> Bowei Liu,<sup>a</sup> Sijia Gao,<sup>a,b</sup> Zhaocheng Wang,<sup>a,b</sup> Ye Tian,<sup>\*a</sup> Man Wu,<sup>a</sup> Shidong

Jiang<sup>a</sup> and Zhongwei Niu<sup>\*a</sup>

*<sup>a</sup>Key Laboratory of Photochemical Conversion and Optoelectronic Materials, Technical  
Institute of Physics and Chemistry, Chinese Academy of Sciences, Beijing 100190, China.*

*<sup>b</sup>University of Chinese Academy of Sciences, Beijing 100049, China*

\* Corresponding authors. E-mail: [niu@mail.ipc.ac.cn](mailto:niu@mail.ipc.ac.cn)(Z.N.); [tiany@mail.ipc.ac.cn](mailto:tiany@mail.ipc.ac.cn)

(Y.T.).

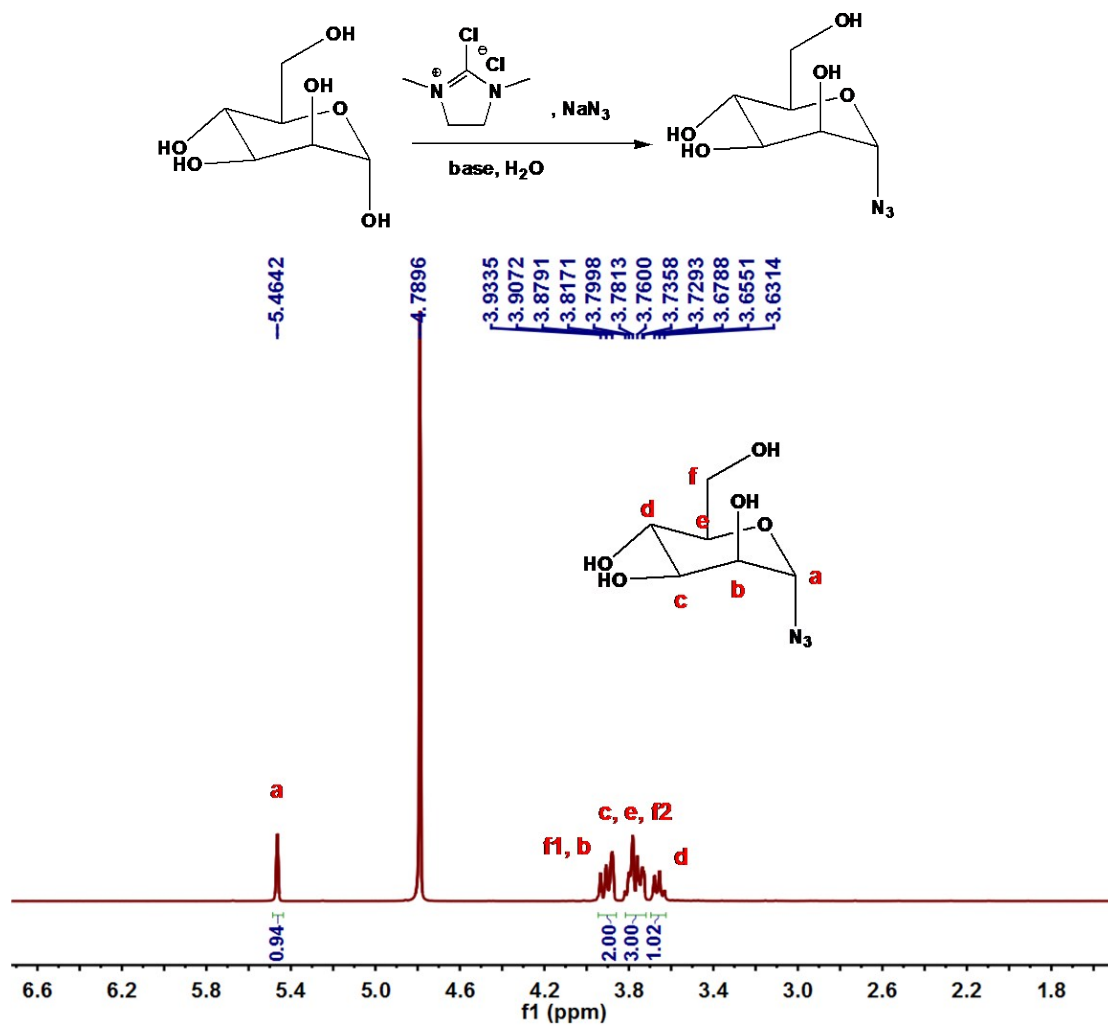

**Figure S1** Synthetic route of  $\alpha$ -D-mannopyranosylazide, and  $^1\text{H}$  NMR of  $\alpha$ -D-mannopyranosylazide in  $\text{D}_2\text{O}$ .

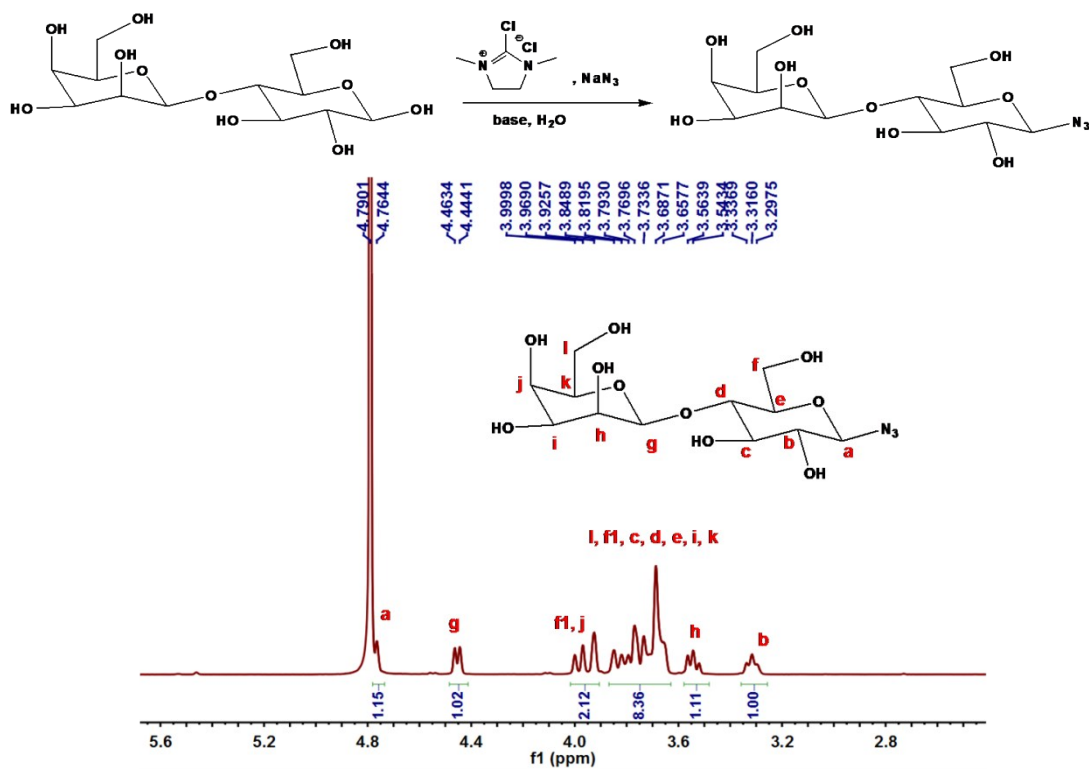

Figure S2 Synthetic route of  $\beta$ -lactosylazide, and  $^1\text{H}$  NMR of  $\beta$ -lactosylazide in  $\text{D}_2\text{O}$ .

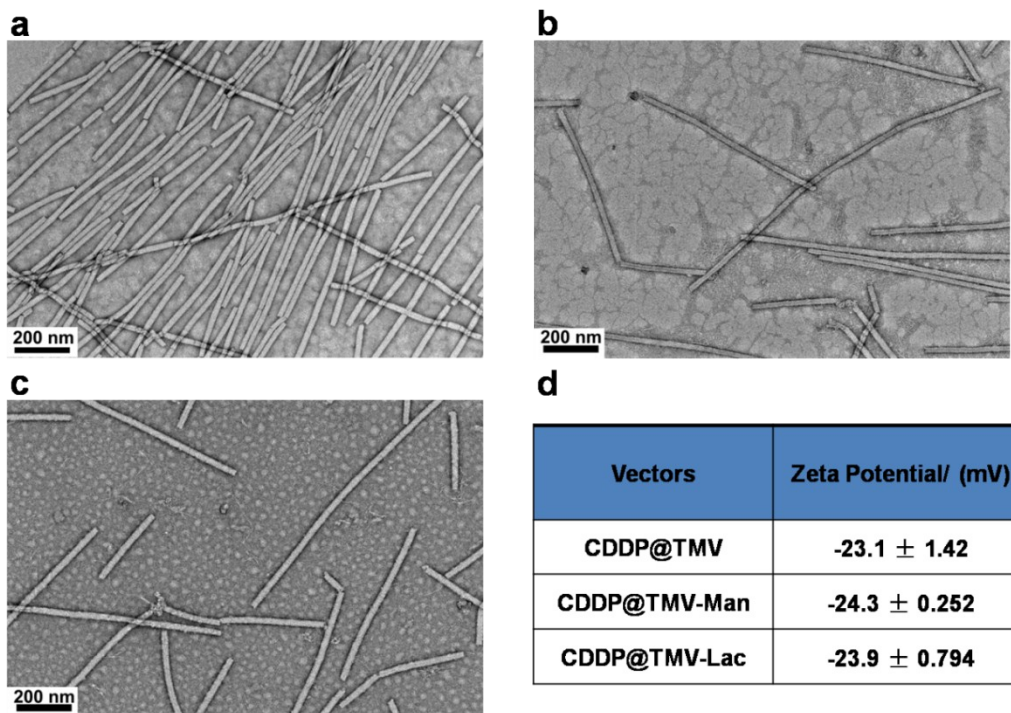

Figure S3 TEM images of TMV drug vectors, including (a) CDDP@TMV, (b) CDDP@TMV-Man and (c) CDDP@TMV-Lac. (d) The list of zeta potential of TMV drug vectors recorded at the same TMV concentration (0.1 mg/mL).

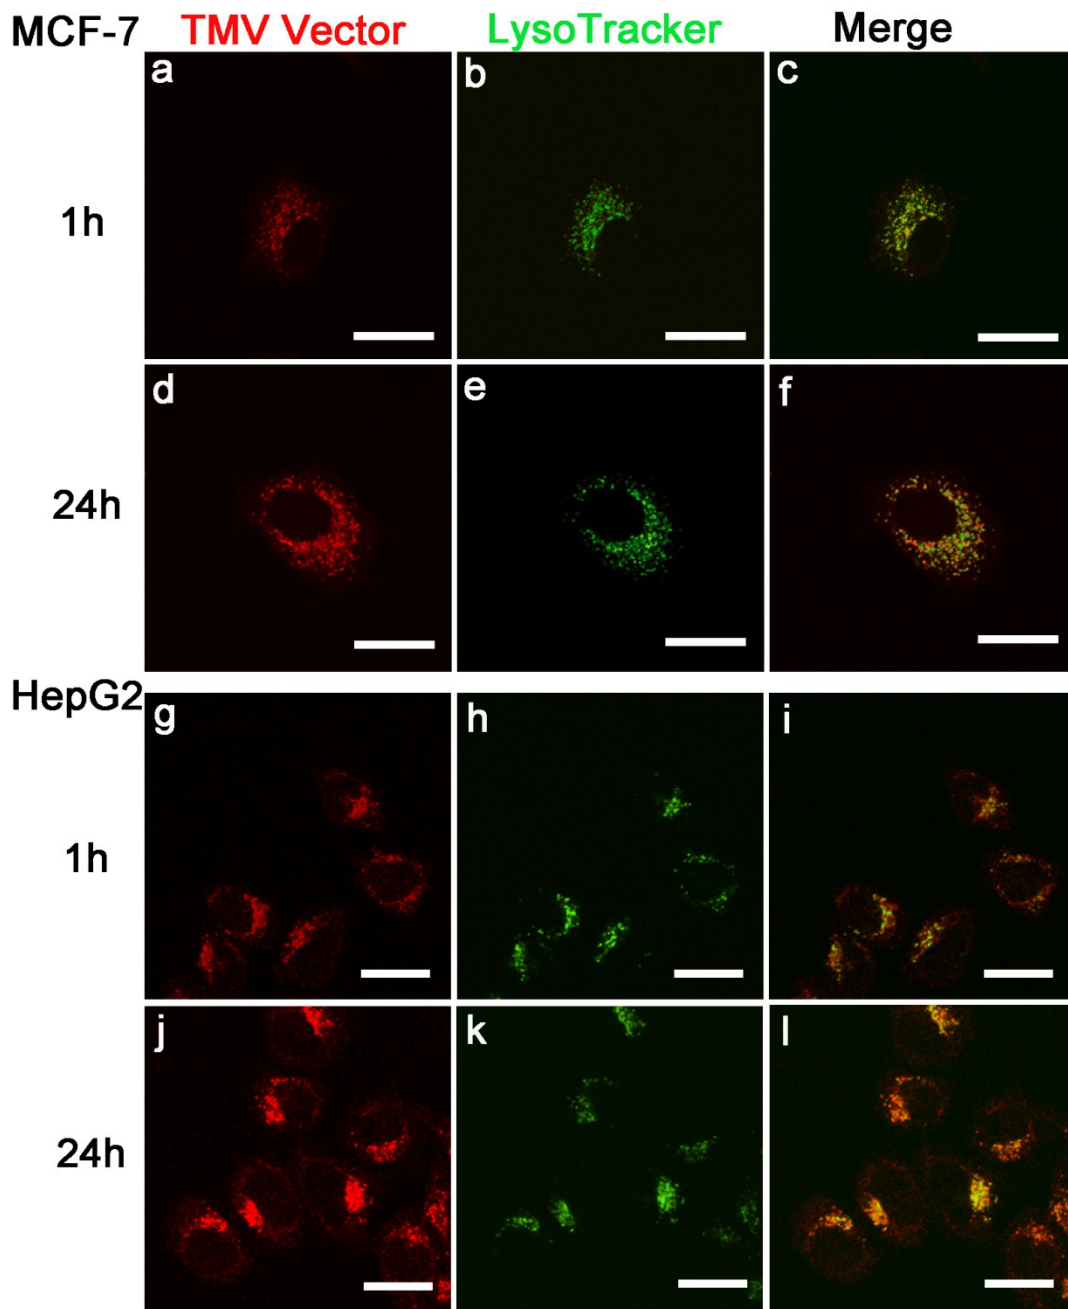

**Figure S4** Confocal laser scanning microscopy (CLSM) of intracellular distribution of TMV vectors at a determined time. (a-f) Intracellular distribution of Rhodamine B labeled TMV-Man incubated in MCF-7 cells for a determined time. (g-l) Intracellular distribution of Rhodamine B labeled TMV-Lac incubated in HepG2 cells for a determined time. Red color was imaged for TMV-Man and TMV-Lac by Rhodamine B, and green color was imaged for lysosomes marked by LysoTracker.

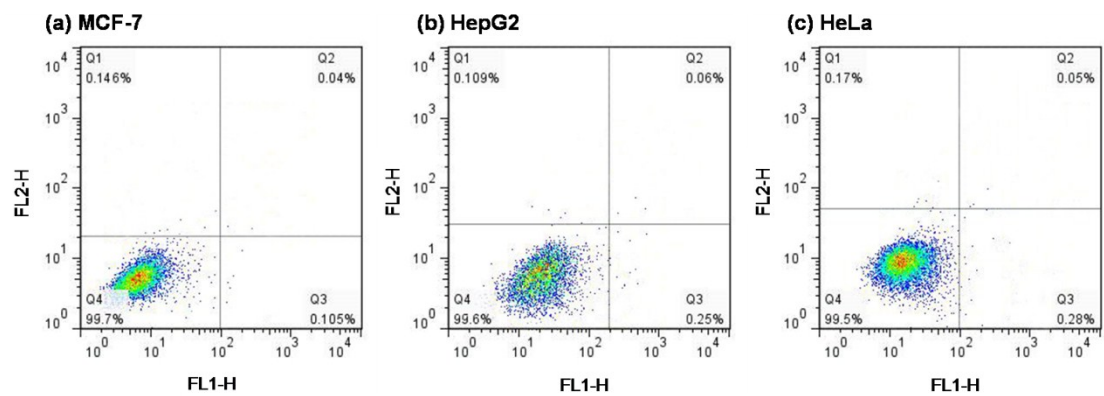

**Figure S5** Cell apoptosis of (a) MCF-7, (b) HepG2 and (c) HeLa control cells, which are not treated with TMV-based drug vectors.
